# Supplementary material
Source: PubMed Central journal article supplement (PMC9899319)

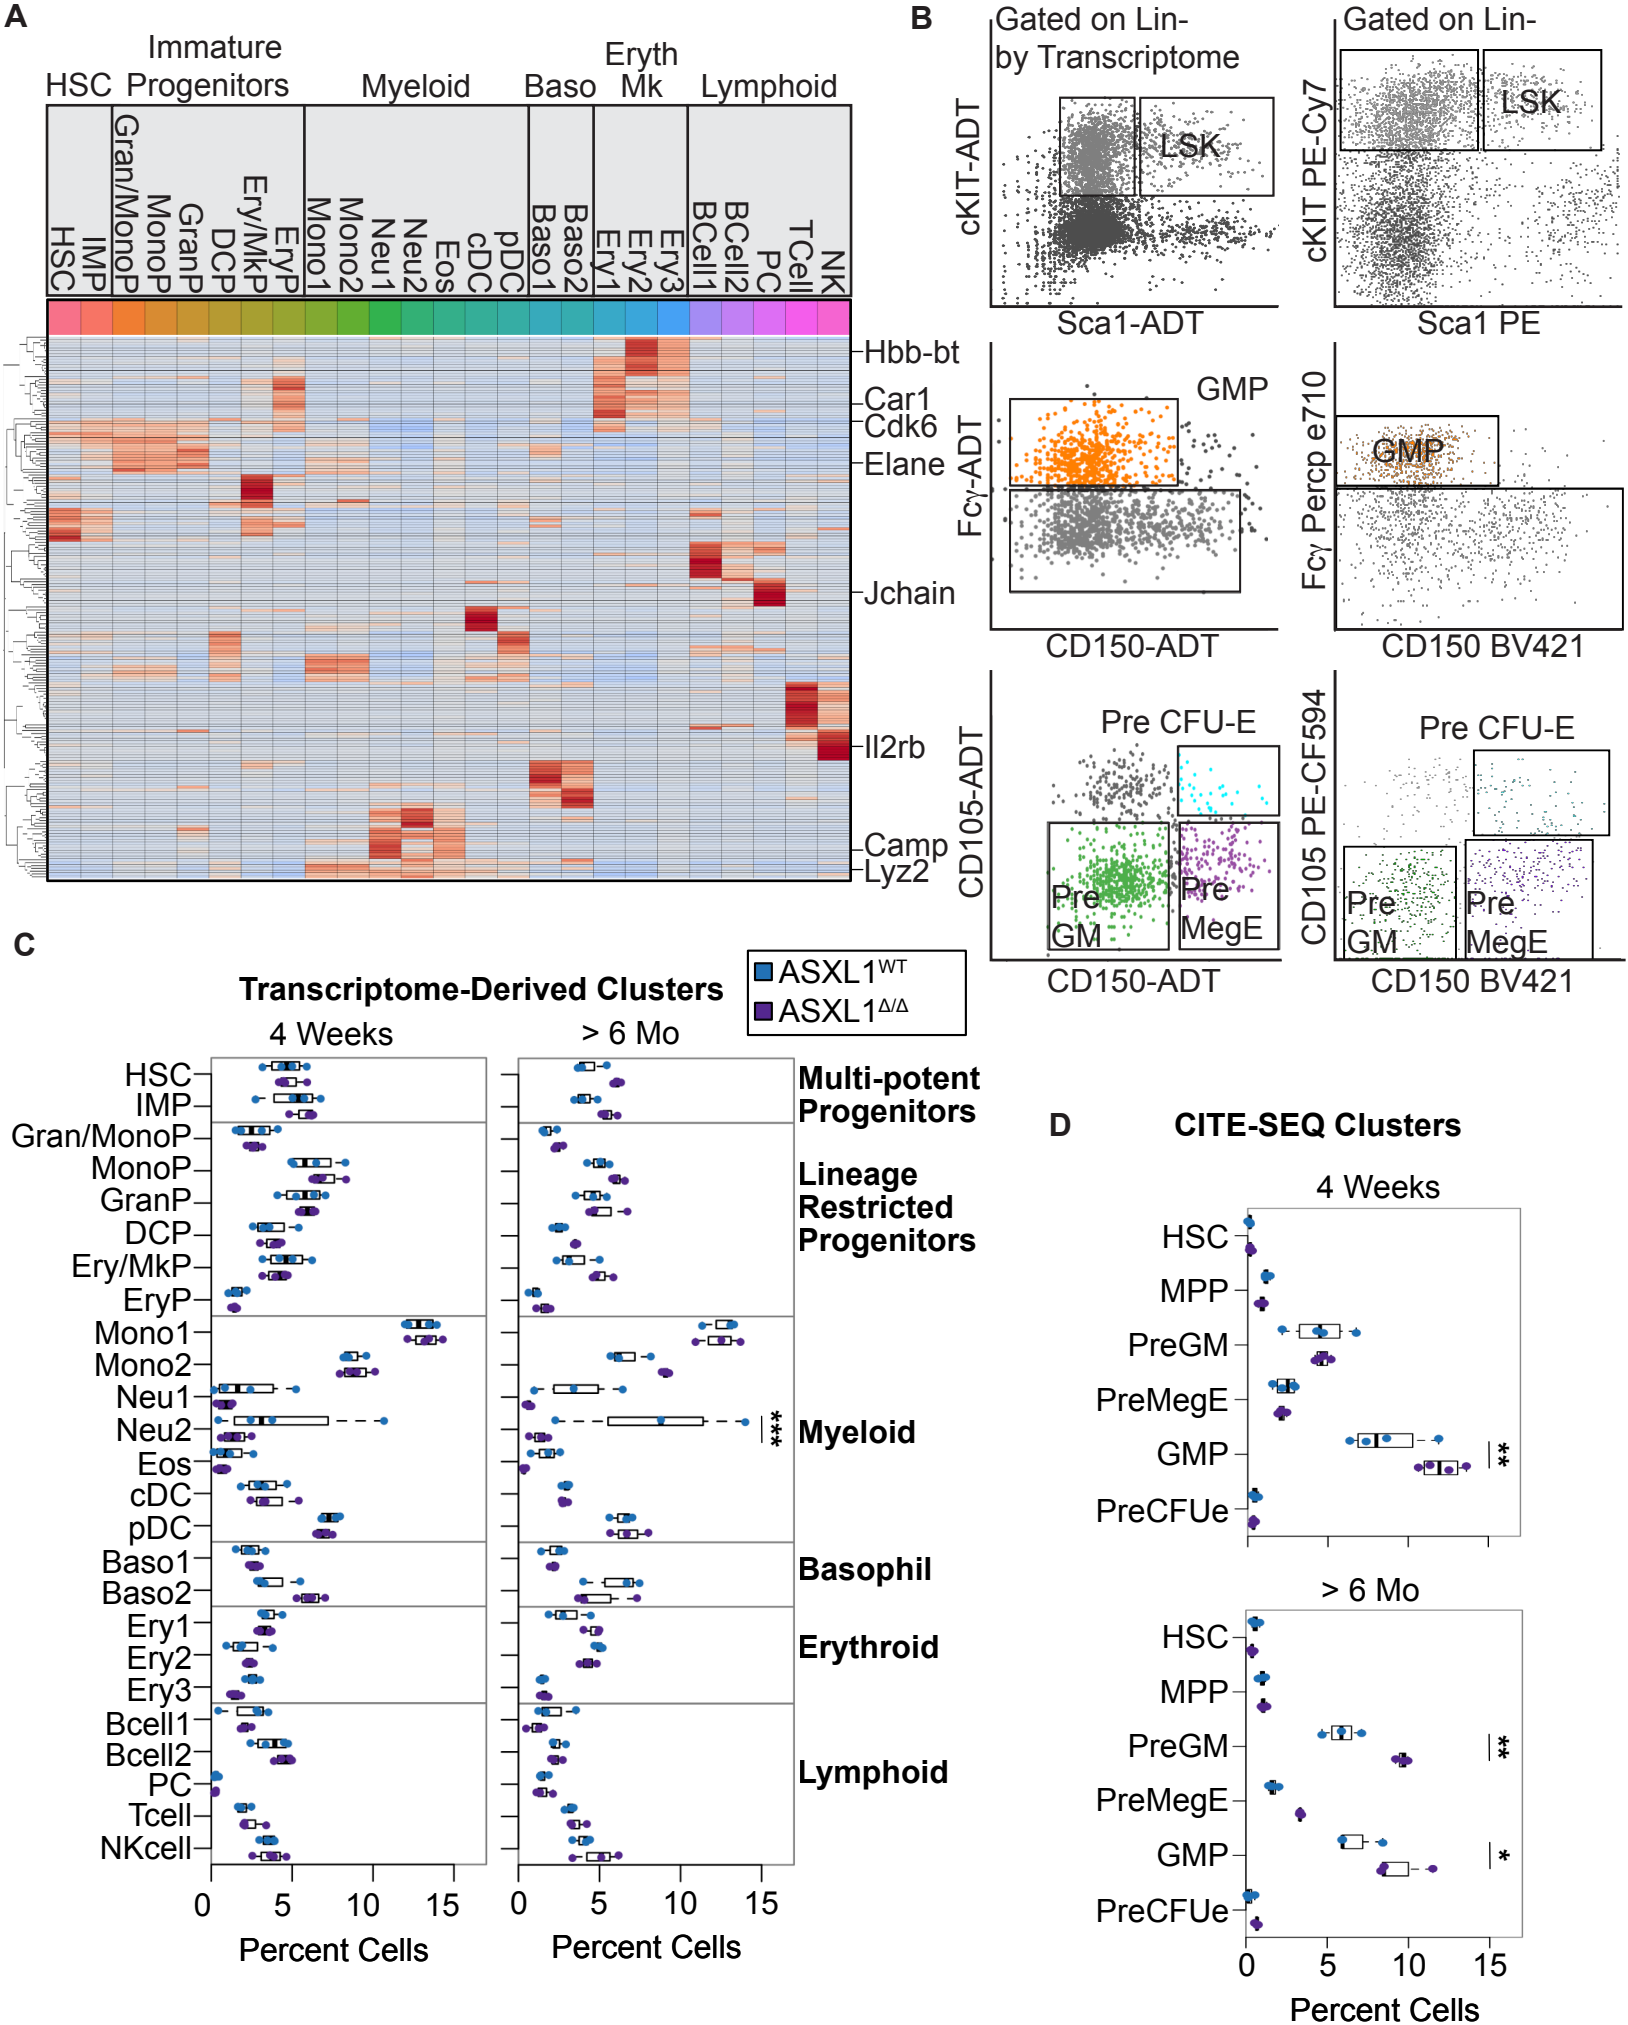

Figure S1

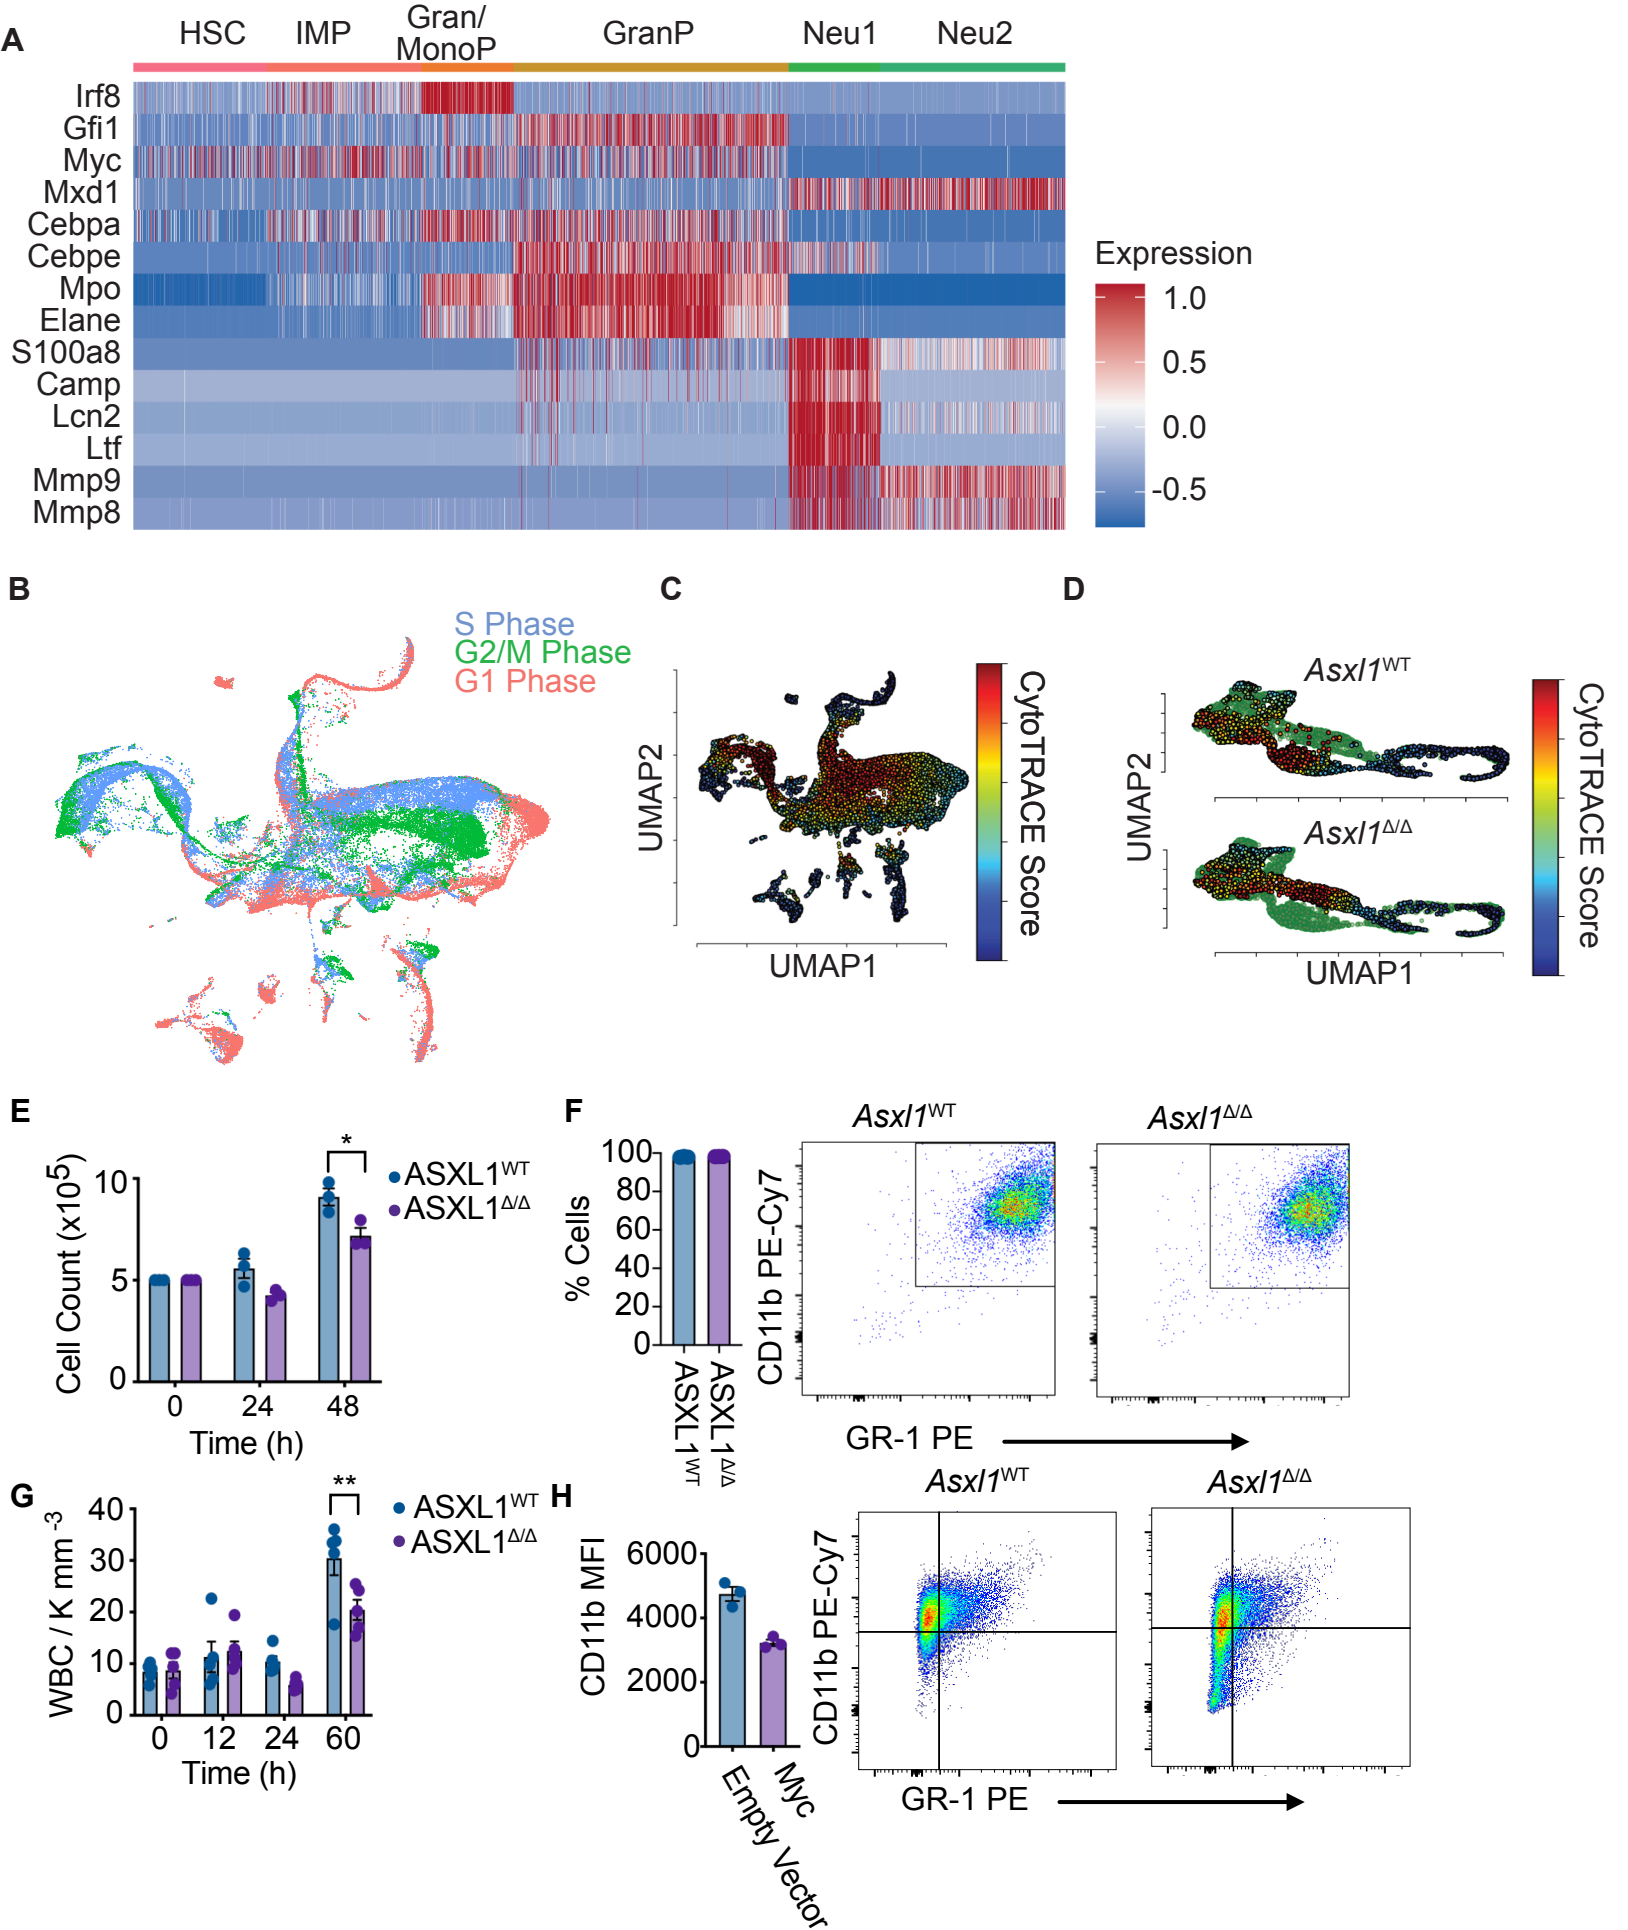

Figure S2

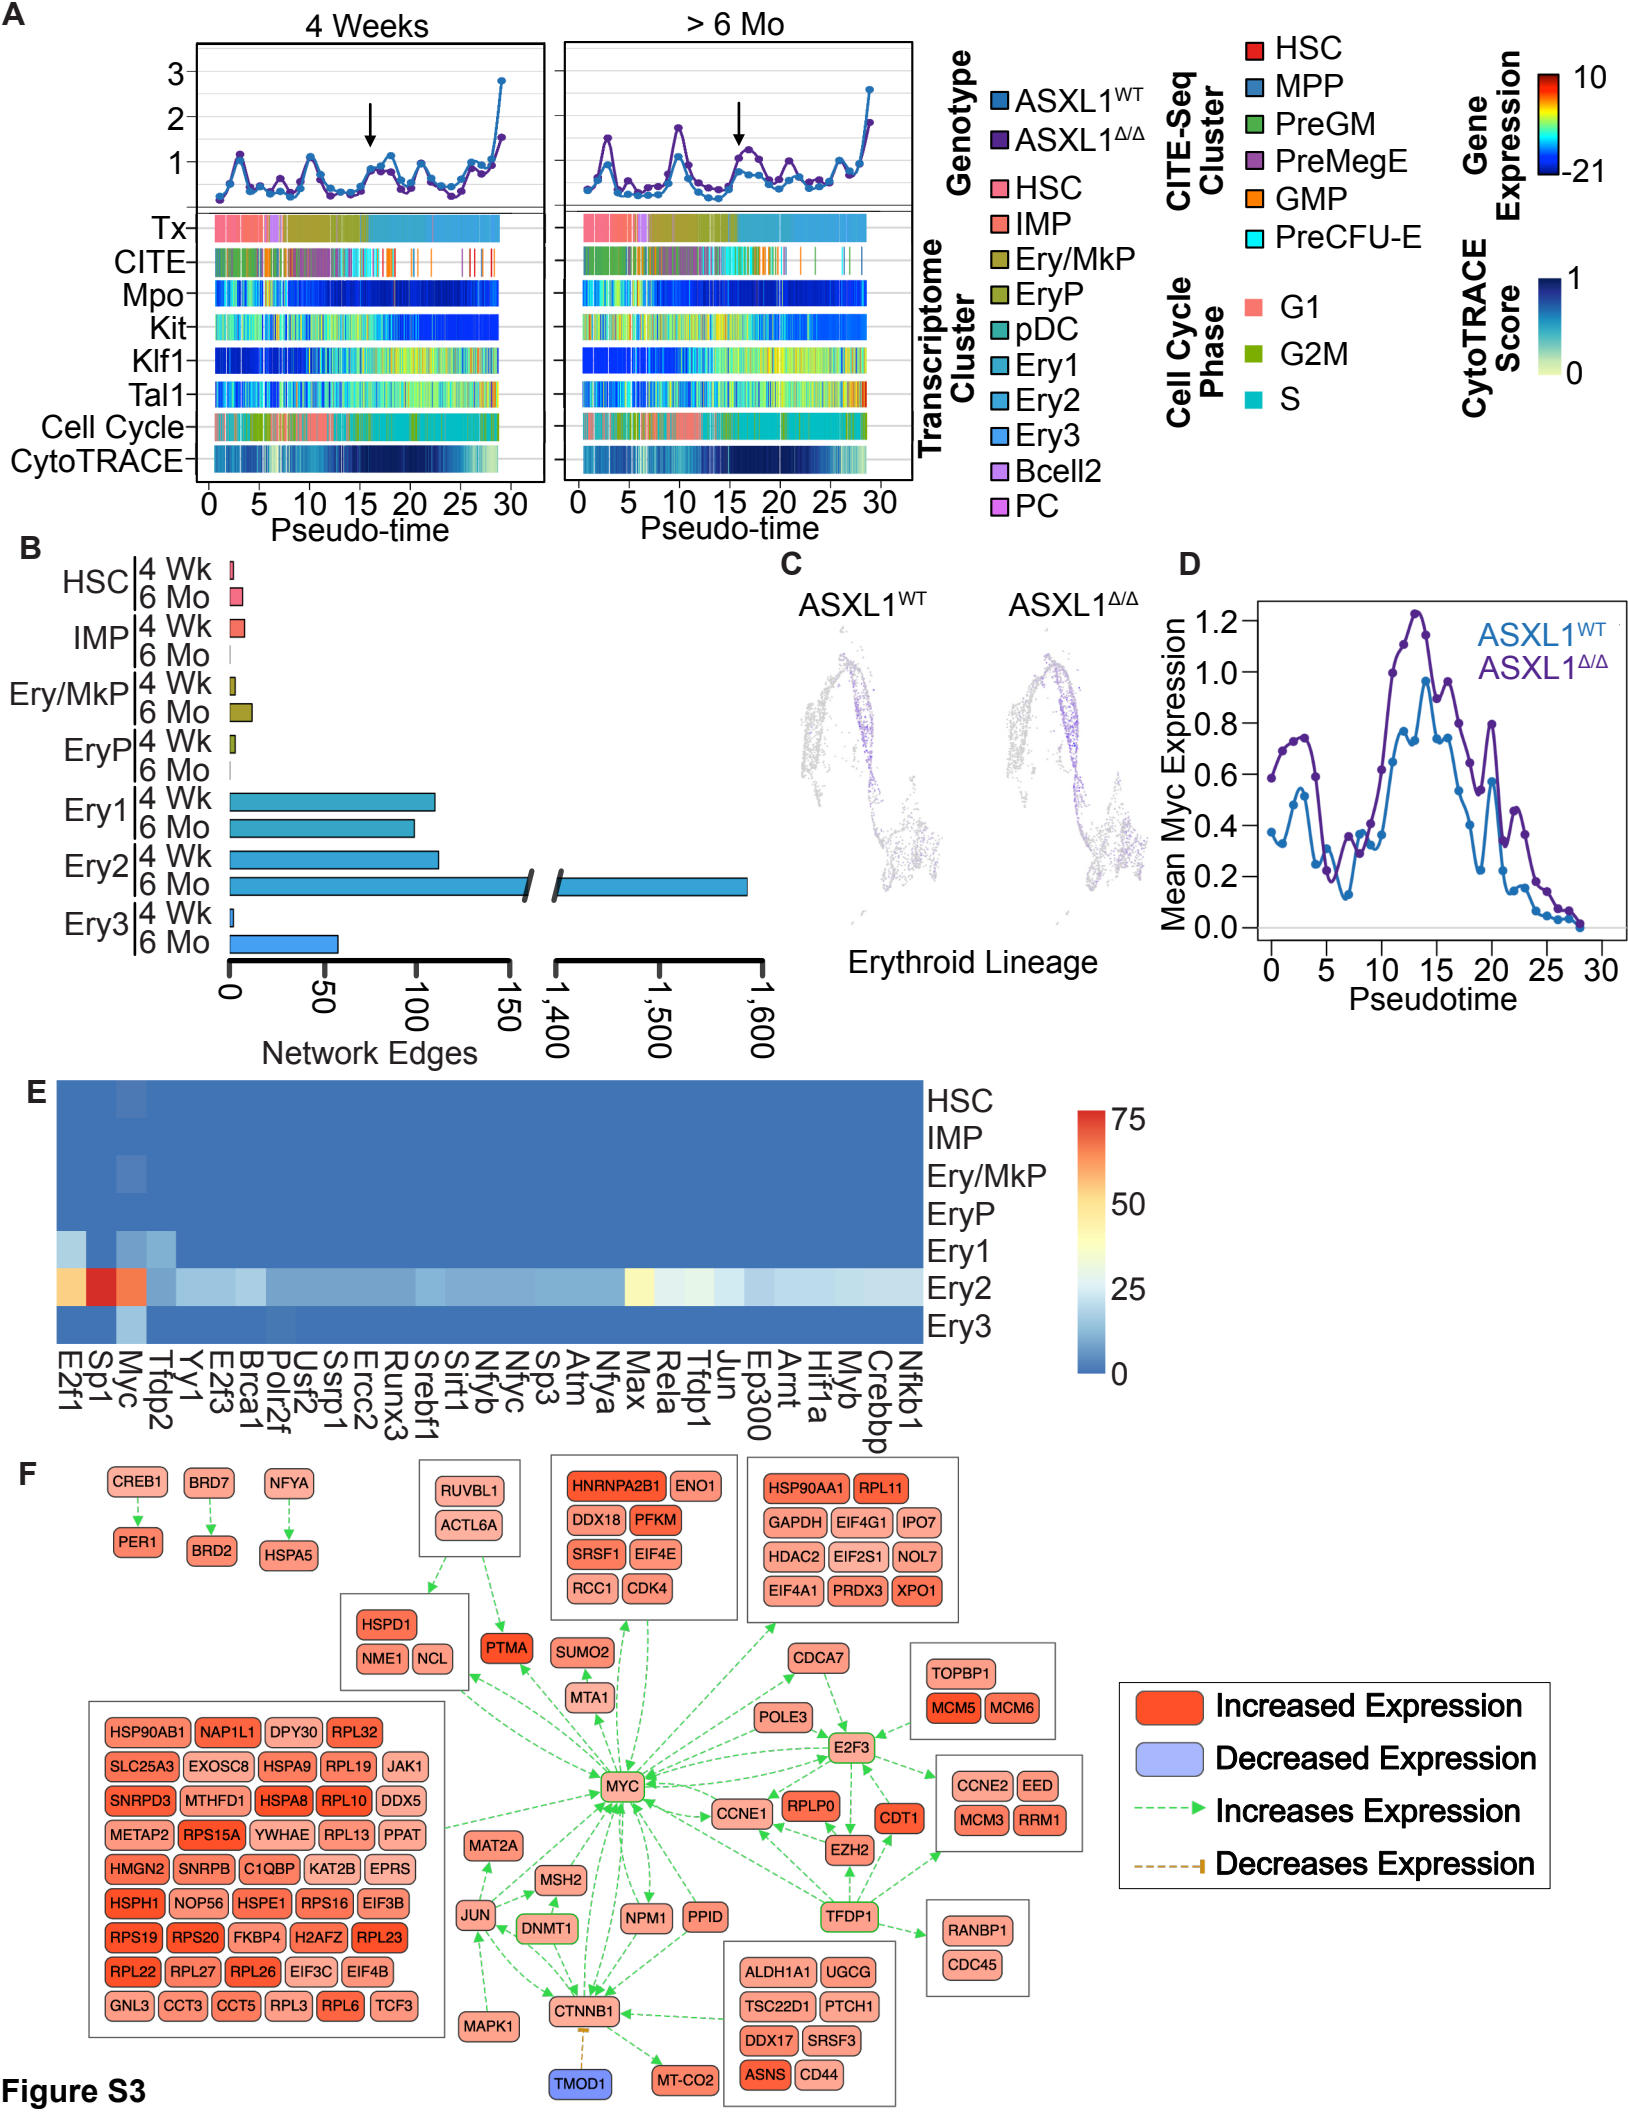

**Figure S3**

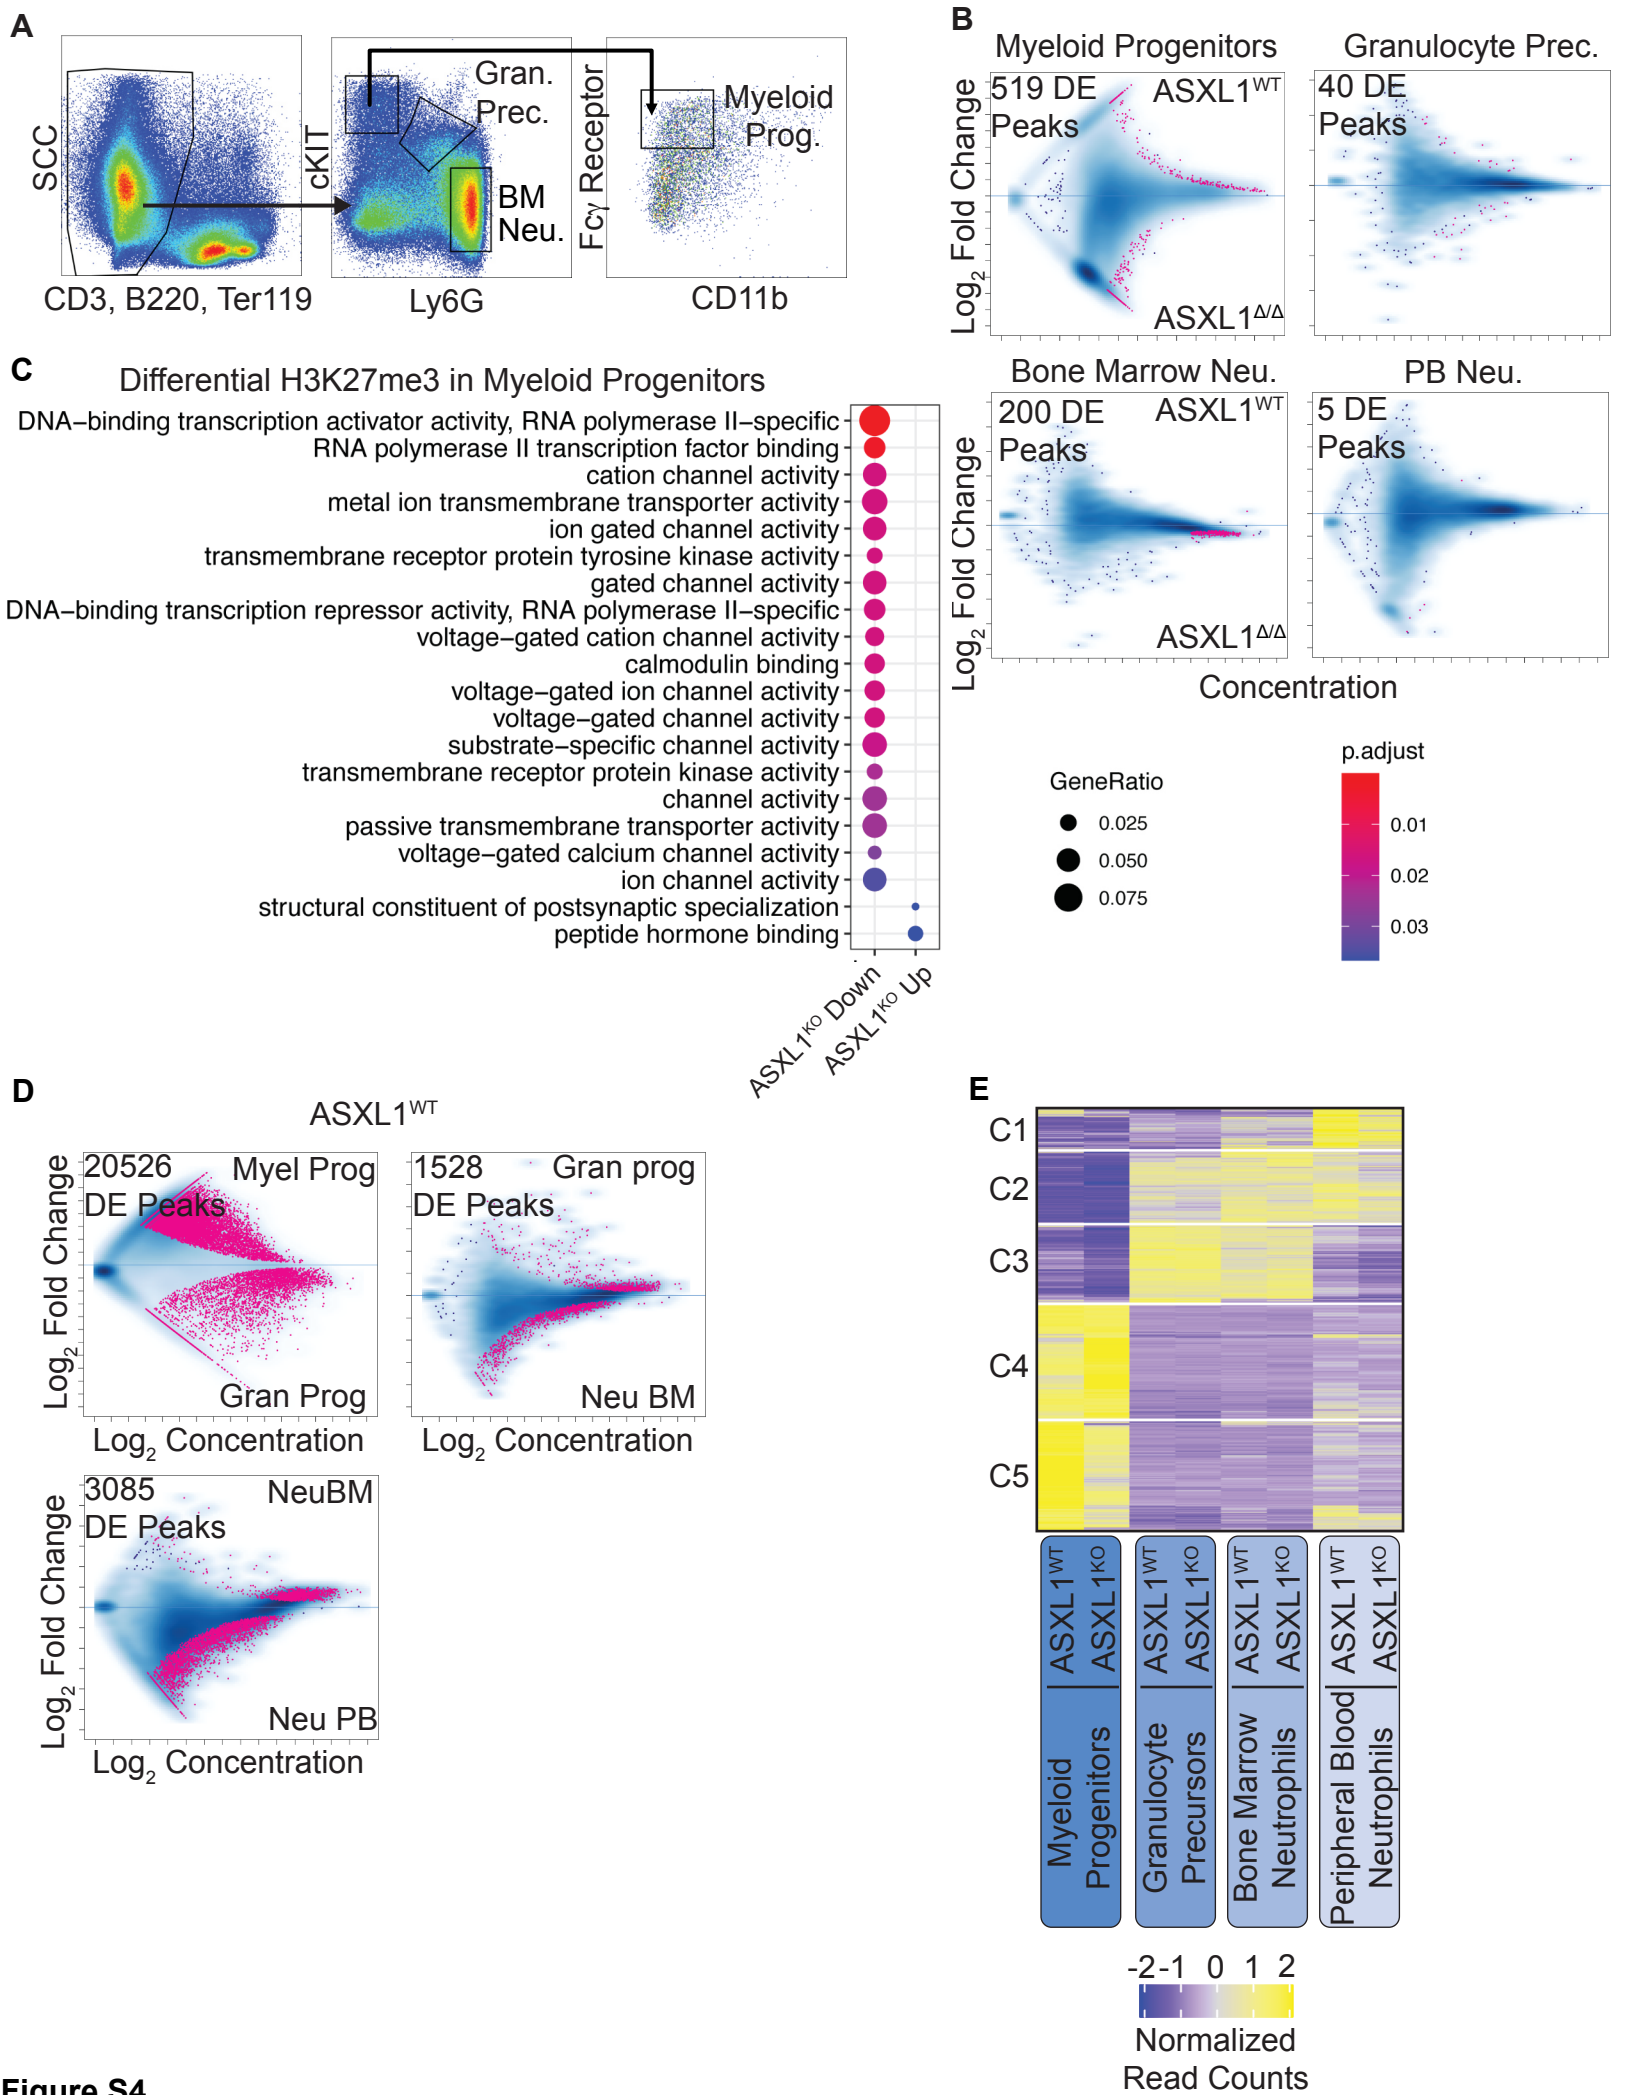

Figure S4

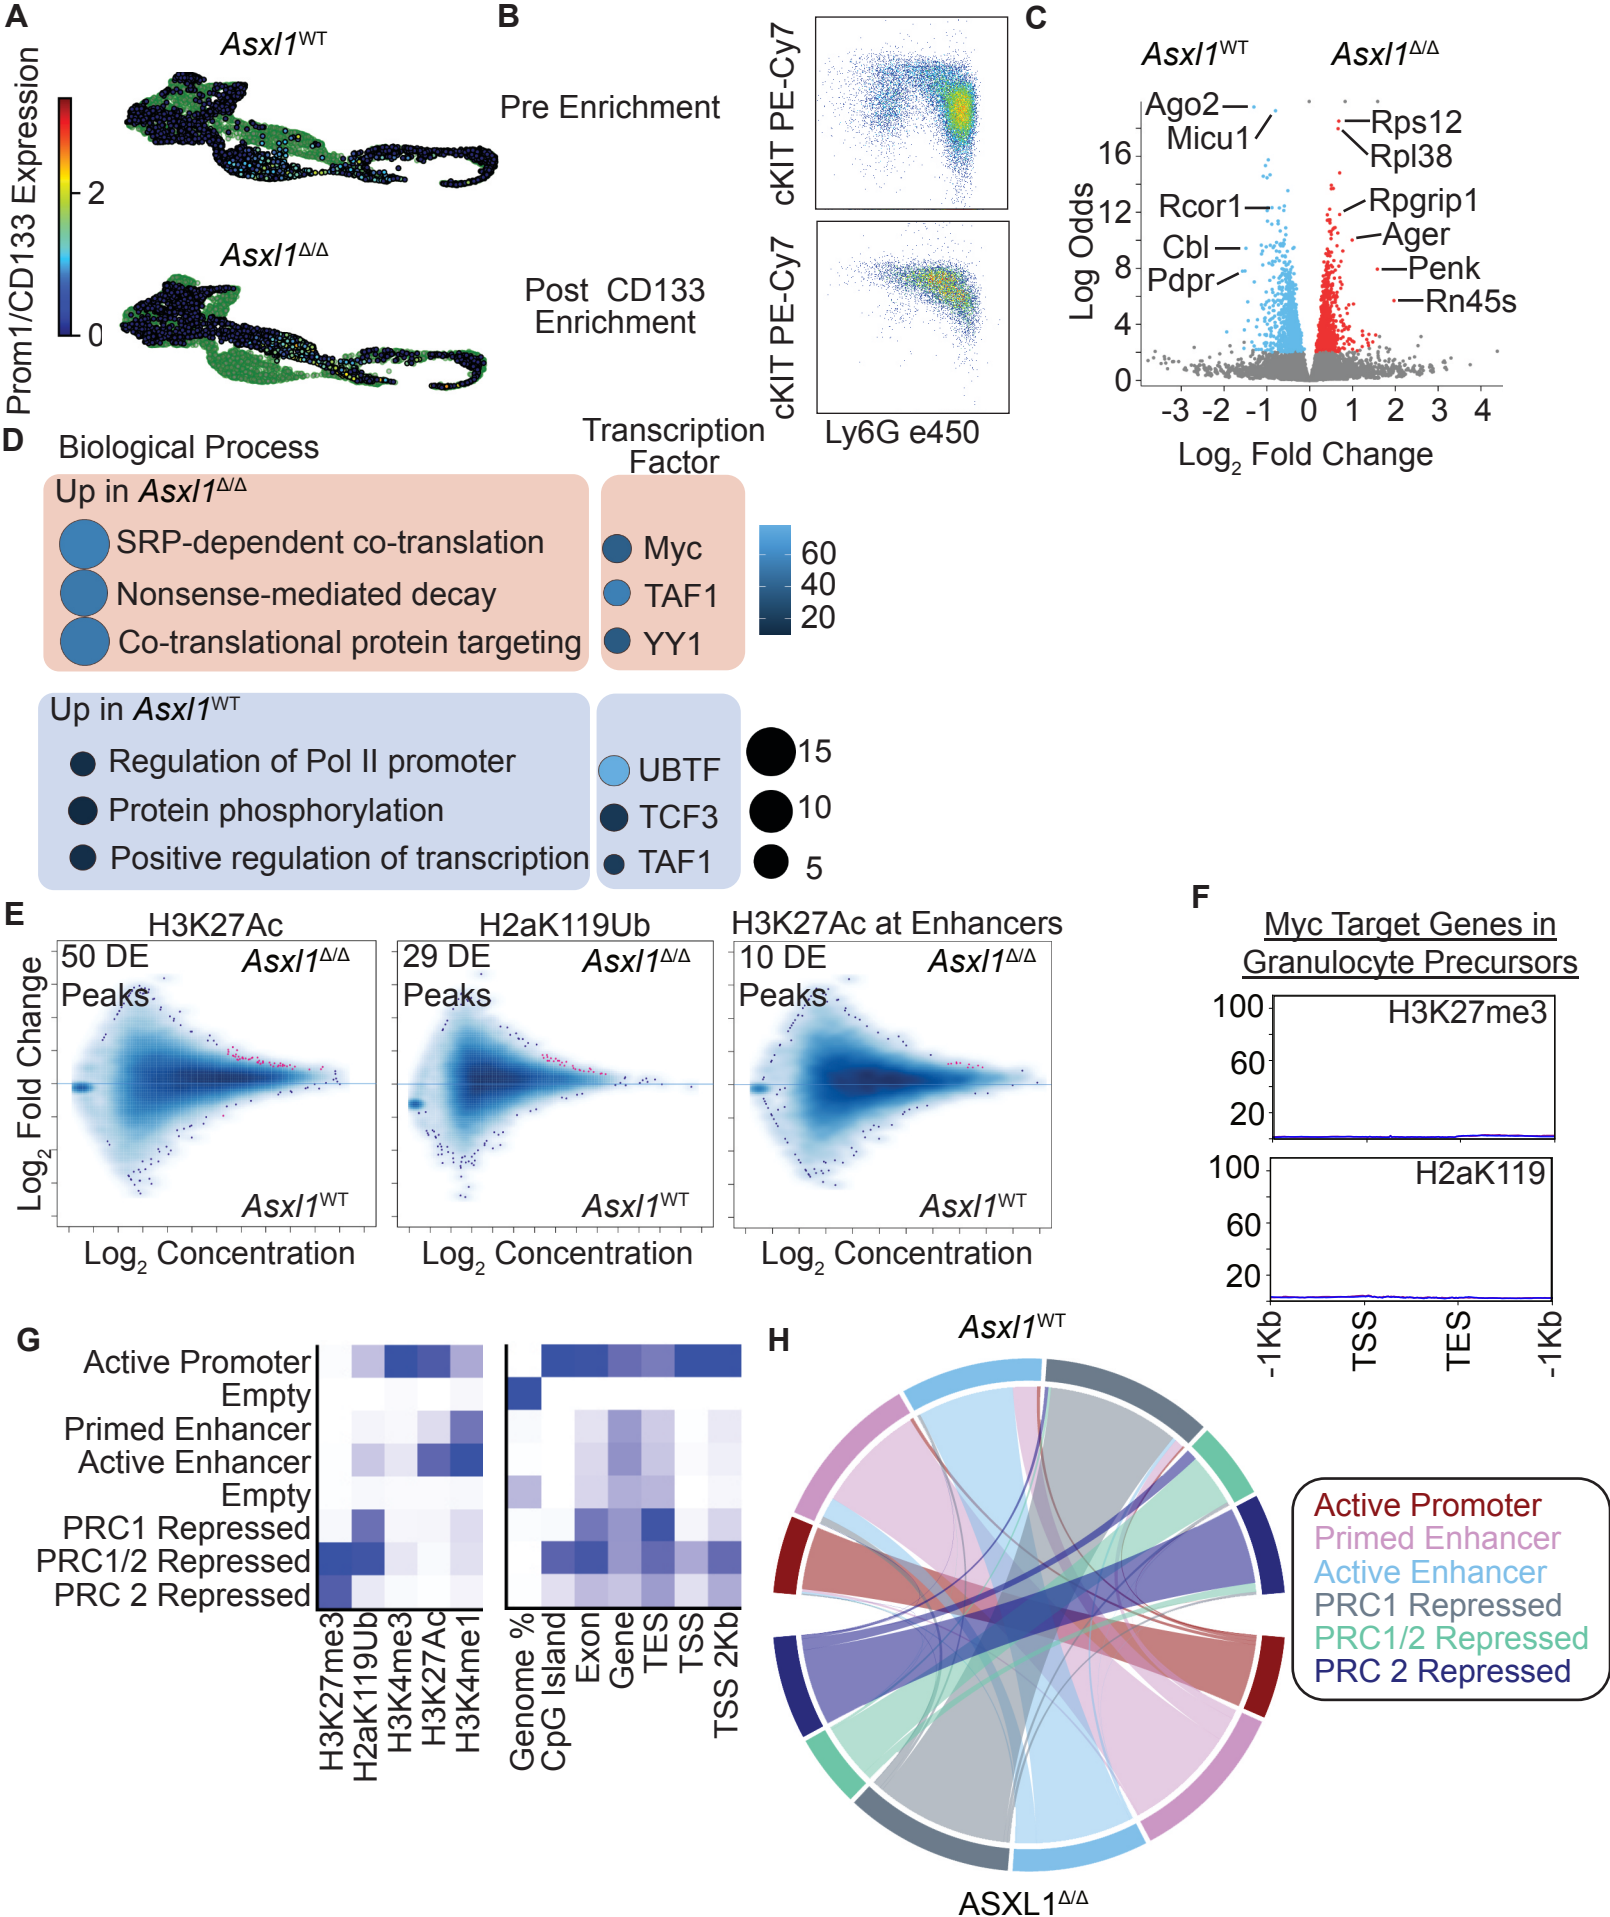

Figure S5

Supplement: NIHMS1857946-supplement-1857946_Sup_Info.pdf [file NIHMS1857946-supplement-1857946_Sup_Info.pdf]
